# Supplementary material for: Diversity of felodipine solvates: structure and physicochemical properties
Source: Royal Society of Chemistry journal article supplement (doi:10.1039/c5ce00350d), 2015-01-01
Supplement: c5ce00350d1.pdf [file c5ce00350d1.pdf]

# **Diversity of felodipine solvates: structure and physicochemical properties**

Artem O. Surov, Katarzyna A. Solanko, Andrew D. Bond,  
Annette Bauer-Brandl and German L. Perlovich

## **Supporting Information**

### **Table of contents**

|                                                                                                                                                              |           |
|--------------------------------------------------------------------------------------------------------------------------------------------------------------|-----------|
| <b>1. Conformational analysis</b>                                                                                                                            | <b>2</b>  |
| <b>2. Description of “back-to-back”, “side-on” and “face-to-face” contacts</b>                                                                               | <b>4</b>  |
| <b>3. Description of methods used to find a relationship between the solvent properties and the crystal packing arrangement of felodipine in the crystal</b> | <b>6</b>  |
| <b>4. Crystal Packing Similarity analysis</b>                                                                                                                | <b>7</b>  |
| <b>5. Hot stage microscopy experiments</b>                                                                                                                   | <b>8</b>  |
| <b>6. Thermogravimetric analysis</b>                                                                                                                         | <b>11</b> |
| <b>7. The 2-D fingerprint plots</b>                                                                                                                          | <b>13</b> |
| <b>8. Solution calorimetry data</b>                                                                                                                          | <b>14</b> |
| <b>9. Crystallographic data of the felodipine solvates</b>                                                                                                   | <b>15</b> |
| <b>10. References</b>                                                                                                                                        | <b>16</b> |

## 1. Conformational analysis

Analysis of the molecular conformation of felodipine shows that conformational changes are mainly due to the torsional flexibility of the methyl and ethyl ester groups, while the rest of the molecule remains virtually invariant. Therefore, all the felodipine conformations can be described by considering the two torsion angles  $\tau_1$  and  $\tau_2$  as shown in Fig. S1a. Fig. S1b shows the distributions of the torsion angles,  $\tau_1$  and  $\tau_2$ , in all known crystal forms of felodipine.

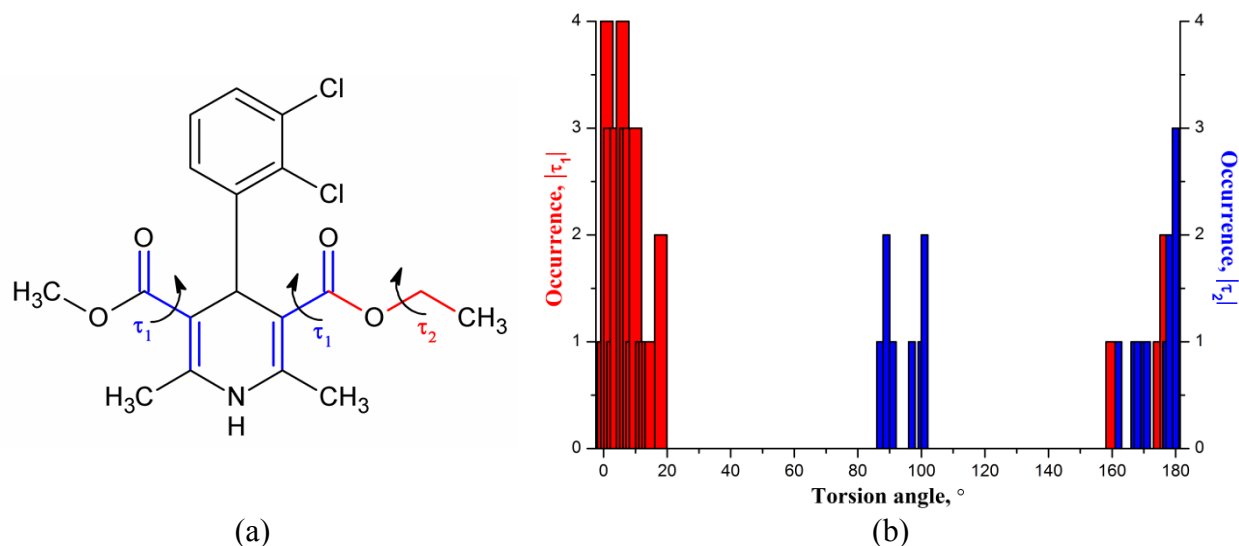

**Fig. S1.** (a) Flexible torsion angles in the felodipine molecule; (b) distributions of the torsion angle,  $|\tau_1|$  (red), and the torsion angle,  $|\tau_2|$  (blue), in all known crystal forms of **Fel**.

A value of  $|\tau_1|$  close to 0 indicates that the C=O group points towards the Me group of the 1,4-dihydropyridine ring, while  $|\tau_1|$  close to 180° indicates that it points away. A value of  $|\tau_2| = 180^\circ$  indicates that the entire ester group is essentially planar, while a value of  $|\tau_2| = 90^\circ$  indicates that the terminal CH<sub>2</sub>–CH<sub>3</sub> bond lies perpendicular to the plane of the remainder of the group.

Apparently, most of the  $|\tau_1|$  values are located in the low-angle region (84% of the total number), whereas only 16% of the values belong to the high-angle region. This distribution is consistent with the calculation results described in our previous work.<sup>1</sup> It has been shown that the molecules with  $\tau_1 = 180^\circ$  are relatively higher-energy conformers of felodipine compared to the molecules with  $\tau_1 = 0^\circ$ . Moreover, all conformations with  $|\tau_1|$  close to 180° are stabilized by either hydrogen bonds (Forms III and IV of pure **Fel**, [**Fel**+N-MeFA], [**Fel**+FA]) or intermolecular C-H...O interactions ([**Fel**+APN], [**Fel**+TMU]). In contrast to  $|\tau_1|$ , the  $|\tau_2|$  values are distributed almost uniformly over two regions. About 42 % of the  $|\tau_2|$  values are concentrated at 90°, and 58% of the values lie close to 180°.

Recently, molecular conformations of felodipine in dilute and saturated solution in DMSO have been investigated using NMR spectroscopy.<sup>2</sup> Therefore, it would be interesting to compare

conformations of **Fel** in the crystalline DMSO solvate and a DMSO solution. The authors claim that in the dilute DMSO solution, the dichlorophenyl fragment of the **Fel** molecule is rotated by approximately 180° compared to that in a crystal, so that the Cl atoms are oriented towards the NH group of the 1,4-dihydropyridine ring. This conformation of **Fel** is not observed in any of the felodipine crystal forms including the DMSO solvate. In the saturated solution, however, the fraction of this conformation decreases considerably, and the conformation corresponding to the crystal becomes dominant. Interestingly, according to Teberekidis and Sigalas, the conformation of **Fel** found in the dilute DMSO solution corresponds to the molecule's gas-phase minimum-energy conformation.<sup>3</sup> Moreover, the conformation of **Fel** in the crystal structure of Form I is calculated to be only *ca* 1.0 kJ mol<sup>-1</sup> less stable. However, the energy required for rotation of the dichlorophenyl ring, which is expected to be much greater than 1.0 kJ mol<sup>-1</sup>, has not been discussed in the paper. In fact, the situation remains unclear. There is no experimental evidence for the existence of a relatively lower-energy molecular conformation in any of the felodipine crystal forms, and a dilute DMSO solution seems to be the only reported example.

## 2. Description of “back-to-back”, “side-on” and “face-to-face” contacts

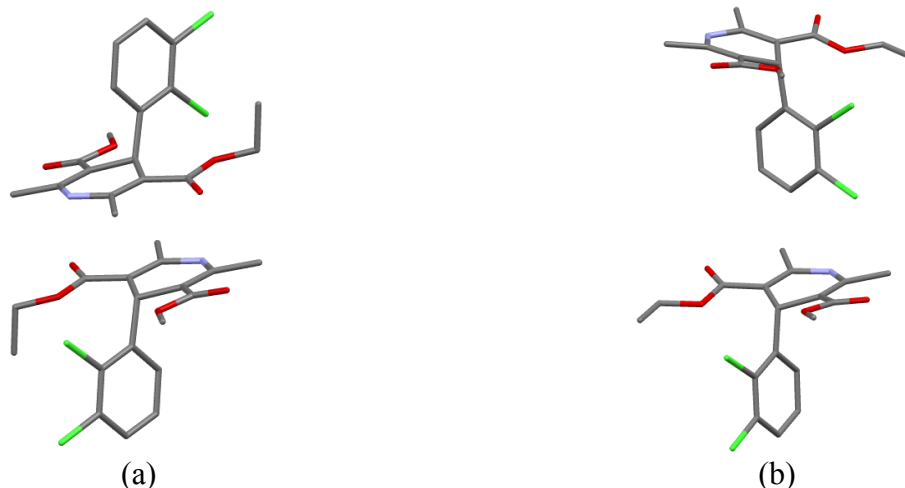

**Figure S2.** Illustration of (a) “back-to-back” and (b) “side-on” interactions in the crystal structures of the felodipine solvates.

A “back-to-back” interaction (Figure S2a) is a recurring motif in the structures of the polymorphs of pure felodipine and the solvates with formamide, *N*-methylformamide, acetone and DMSO. This type of interaction occurs between the 1,4-dihydropyridine rings of the centrosymmetric felodipine molecules, and it can be viewed as stacks of molecular pairs of felodipine in the crystal. A “side-on” notation implies a packing arrangement where the dichlorobenzene ring approaches the backside of the neighbouring 1,4-dihydropyridine ring. (Figure S2b) In this case, the structure does not contain discrete molecular pairs, while the felodipine molecules are arranged into chains or layers.

The “back-to-back” contacts can be characterized by the interplanar distances, i.e. distances between two least-squares planes of the 1,4-dihydropyridine rings of the neighbouring felodipine molecules (Figure S3). This parameter varies from 3.65 to 3.87 Å in felodipine polymorphs, but there are different degrees of lateral slip. In the solvates, the distance range is similar to that in the polymorphs (3.63-3.93).

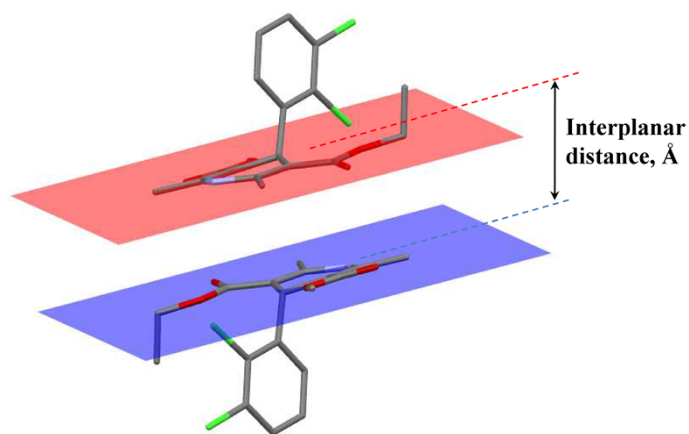

**Figure S3.** Illustration of the interplanar distance between two planes of the 1,4-dihydropyridine rings in the structures with “back-to-back” interactions.

If solvent molecule is flat, it can also form “face-to-face” interactions with the dichlorophenyl ring of felodipine. These interactions are clearly seen in the [FeI+ATN], [FeI+DMF] and [FeI+DMAA] solvates (Figure S4).

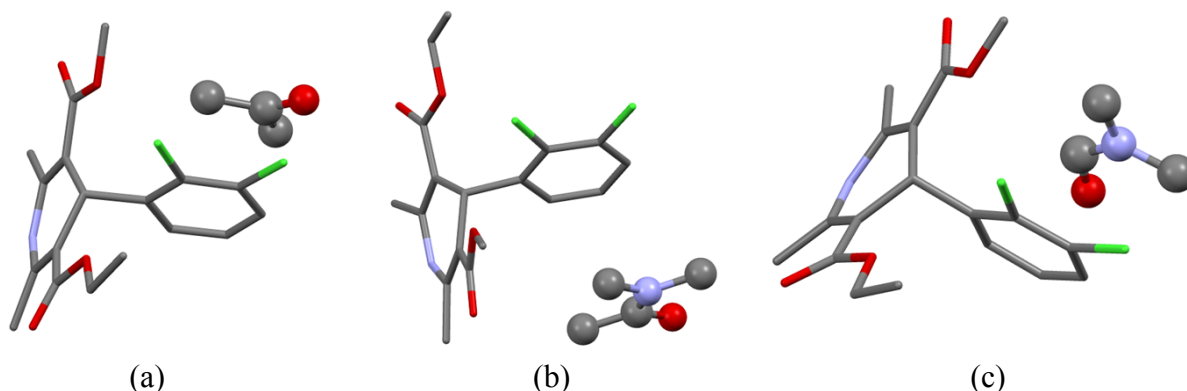

**Figure S4.** Illustration of “face-to-face” contacts between the solvent molecule and the dichlorophenyl ring of felodipine in the crystal structures of (a) [FeI+ATN], (b) [FeI+DMF] and (c) [FeI+DMAA].

### **3. Description of methods used to find a relationship between the solvent properties and the crystal packing arrangement of felodipine in the crystal**

Different characteristics of the solvent molecules were analyzed in order to find a relationship between properties of the solvent and the crystal packing arrangement of the felodipine molecules. The ability of the solvent molecules to form donor-acceptor interactions with the host structure was tested by using the descriptors indicating the sum of all of H-bond acceptor factors in a molecule ( $\sum C_a$ ) and the sum of H-bond donor factors ( $\sum C_d$ ) as well as molecular polarizability ( $\alpha$ ). The descriptors were calculated by the program package HYBOT-PLUS (version of 2003) in Windows.<sup>4</sup> Unfortunately, we did not find any satisfactory correlation between none of those parameters and the packing arrangement of the solvates. As a next step, the topological similarity of the solvent molecules was estimated using Tanimoto similarity indices ( $T_c$ ) obtained by means of the program MOLDIVS (MOlecular DIversity & Similarity).<sup>5</sup> This approach, however, did not reveal any cluster of the solvent molecules with Tanimoto similarity coefficients within  $0.5 < T_c < 1$  range ( $T_c=0$ : no similarity;  $T_c=1$ : identity). Therefore, the difference in the crystal packing does not seem to be due to topological reasons.

#### 4. Crystal Packing Similarity analysis

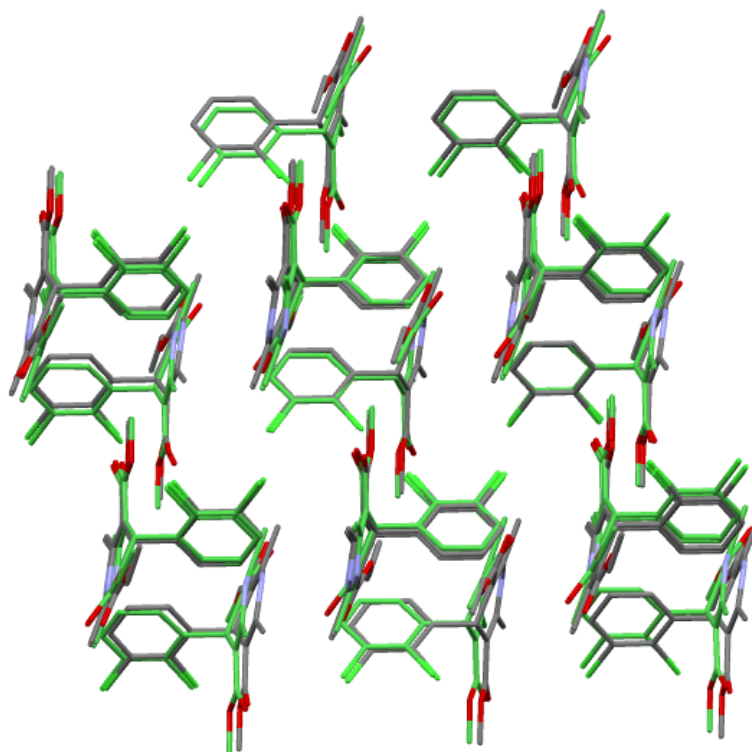

**Fig. S5.** Overlay of the [Fel+DMAA] crystal structure (gray) and [Fel+DMF] (green) ( $n=20$ ,  $\text{rmsd}_n = 0.350$ )

The crystal structures of the felodipine solvates were compared using the Crystal Packing Similarity module<sup>6</sup> implemented in Mercury.<sup>7</sup> The maximum number of molecules ( $n$ ) that can be overlaid in two different structures is 20, when all non-H atom pairs are within a 20% distance tolerance and all corresponding angles within  $20^\circ$ . The smallest molecular components were ignored. The calculated  $\text{rmsd}_n$  is the root-mean-square deviation of all non-H atom positions in the clusters of  $n$  molecules. The program allows for comparisons of crystal structures of different molecules with the  $\text{rmsd}_n$  being calculated from only the common non-H atoms.

## 5. Hot stage microscopy experiments

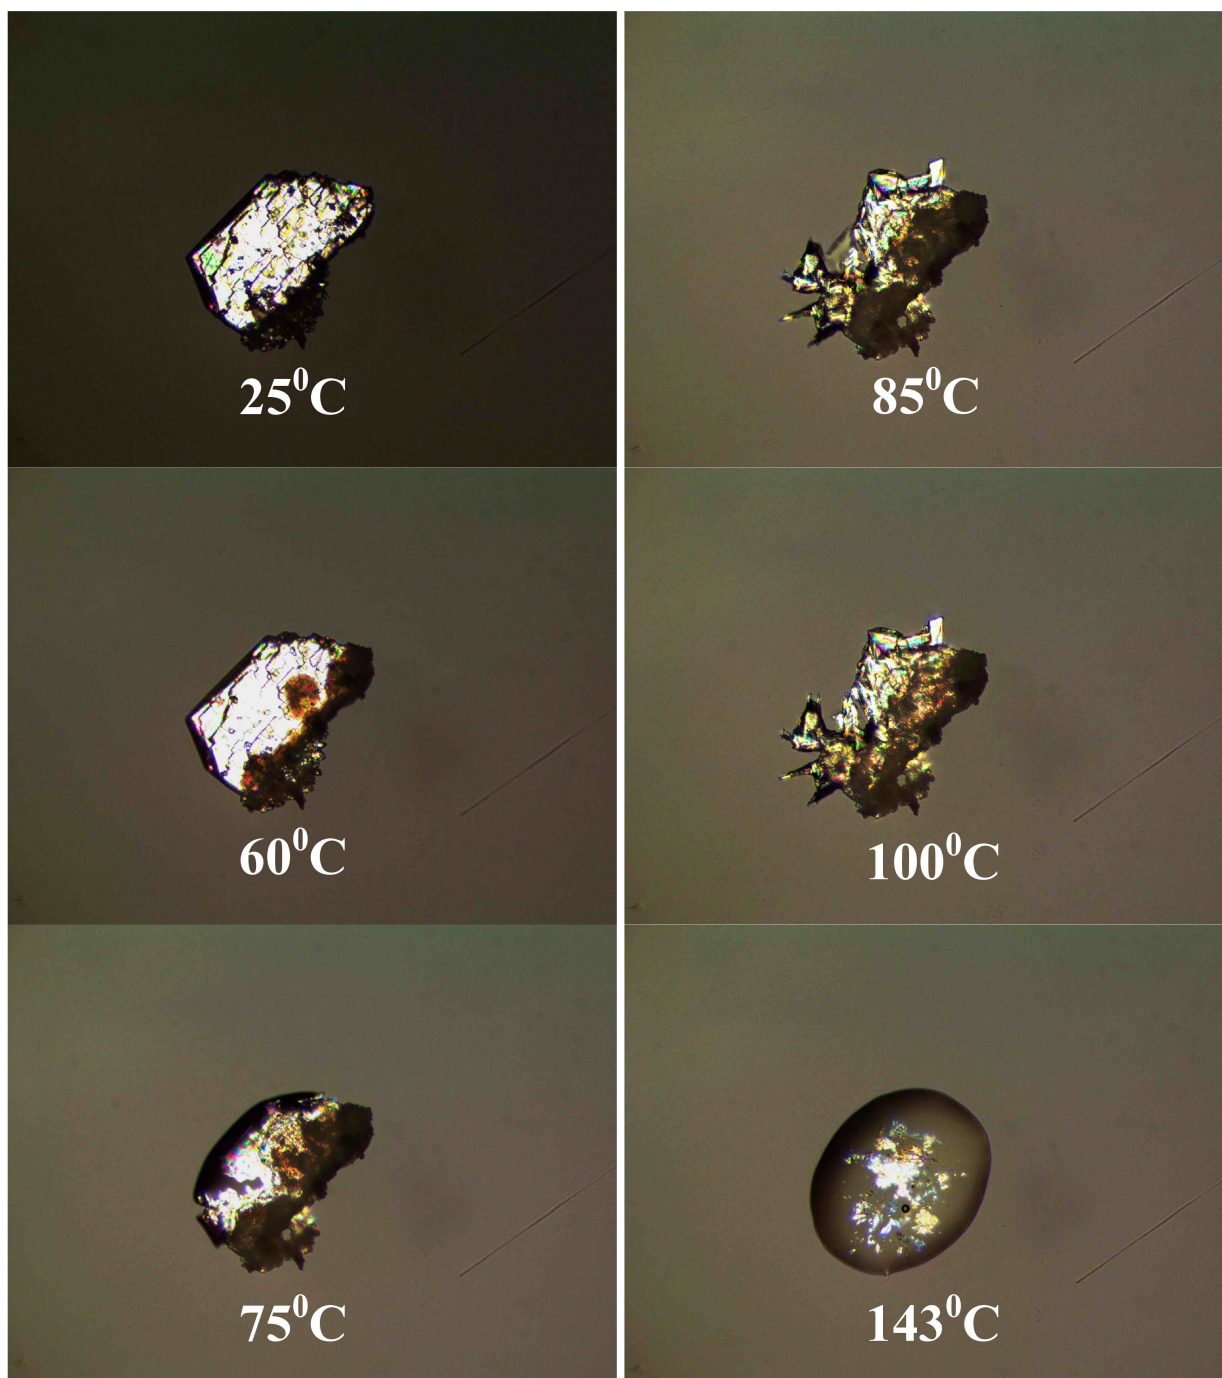

**Fig. S6.** Photomicrographs of [FeI+DMSO] showing thermal decomposition of the solvate.

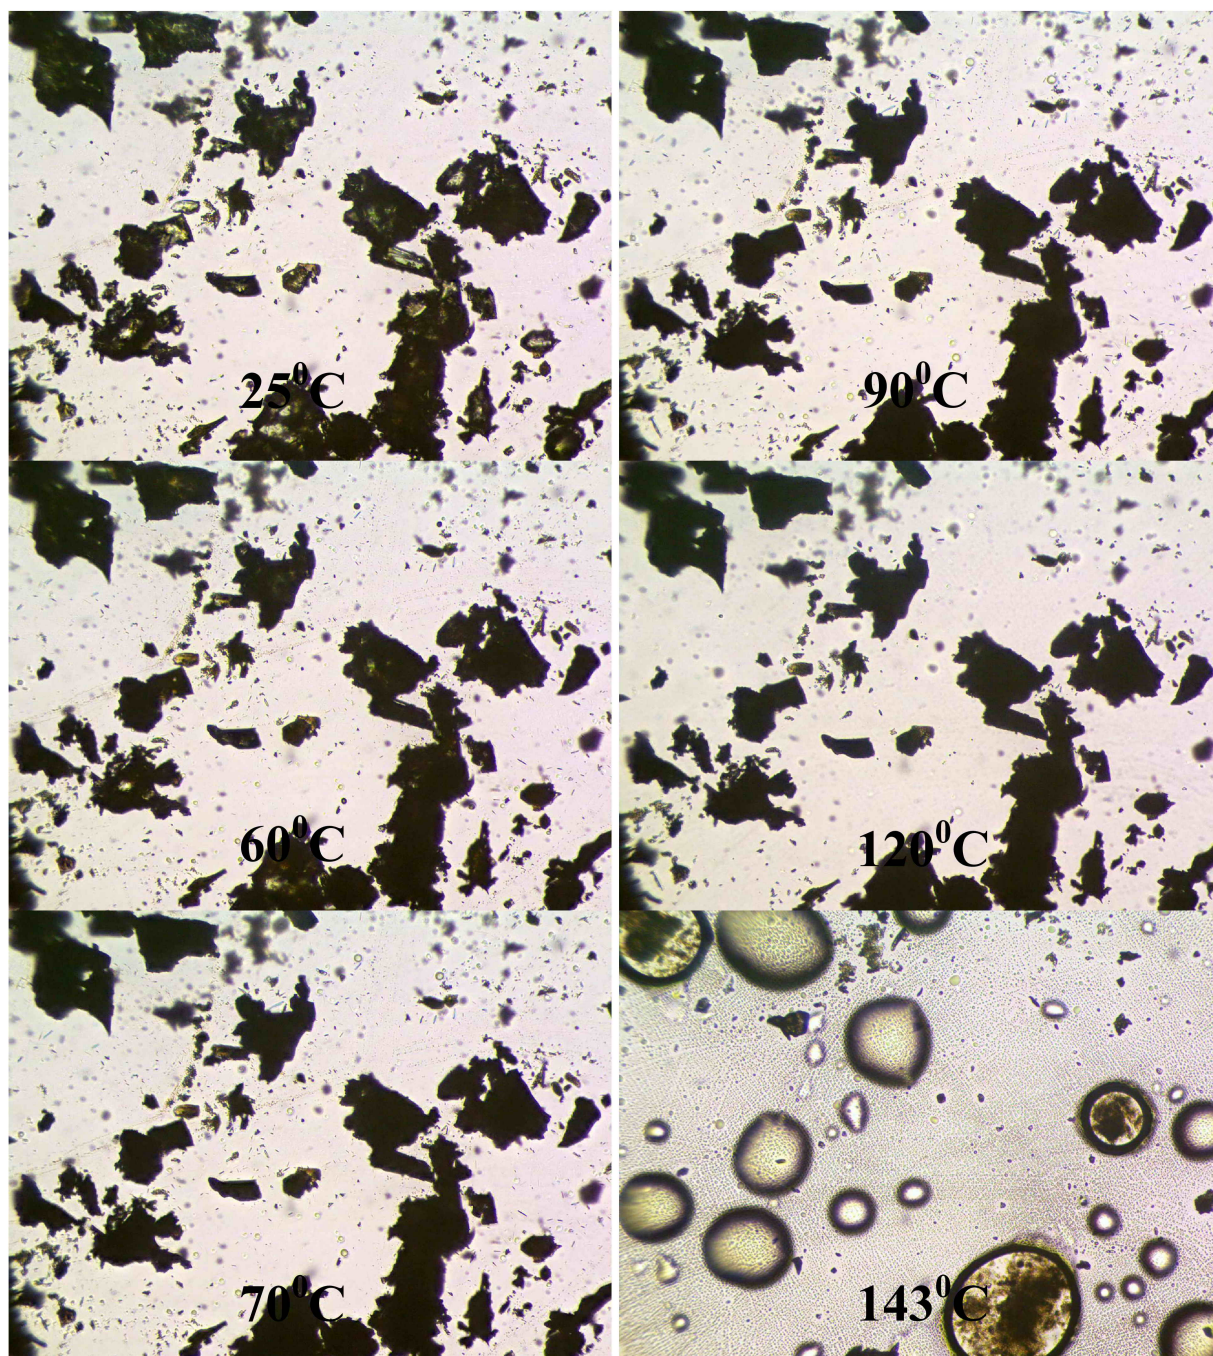

**Fig. S7.** Photomicrographs of [FeI+ATN] showing thermal decomposition of the solvate.

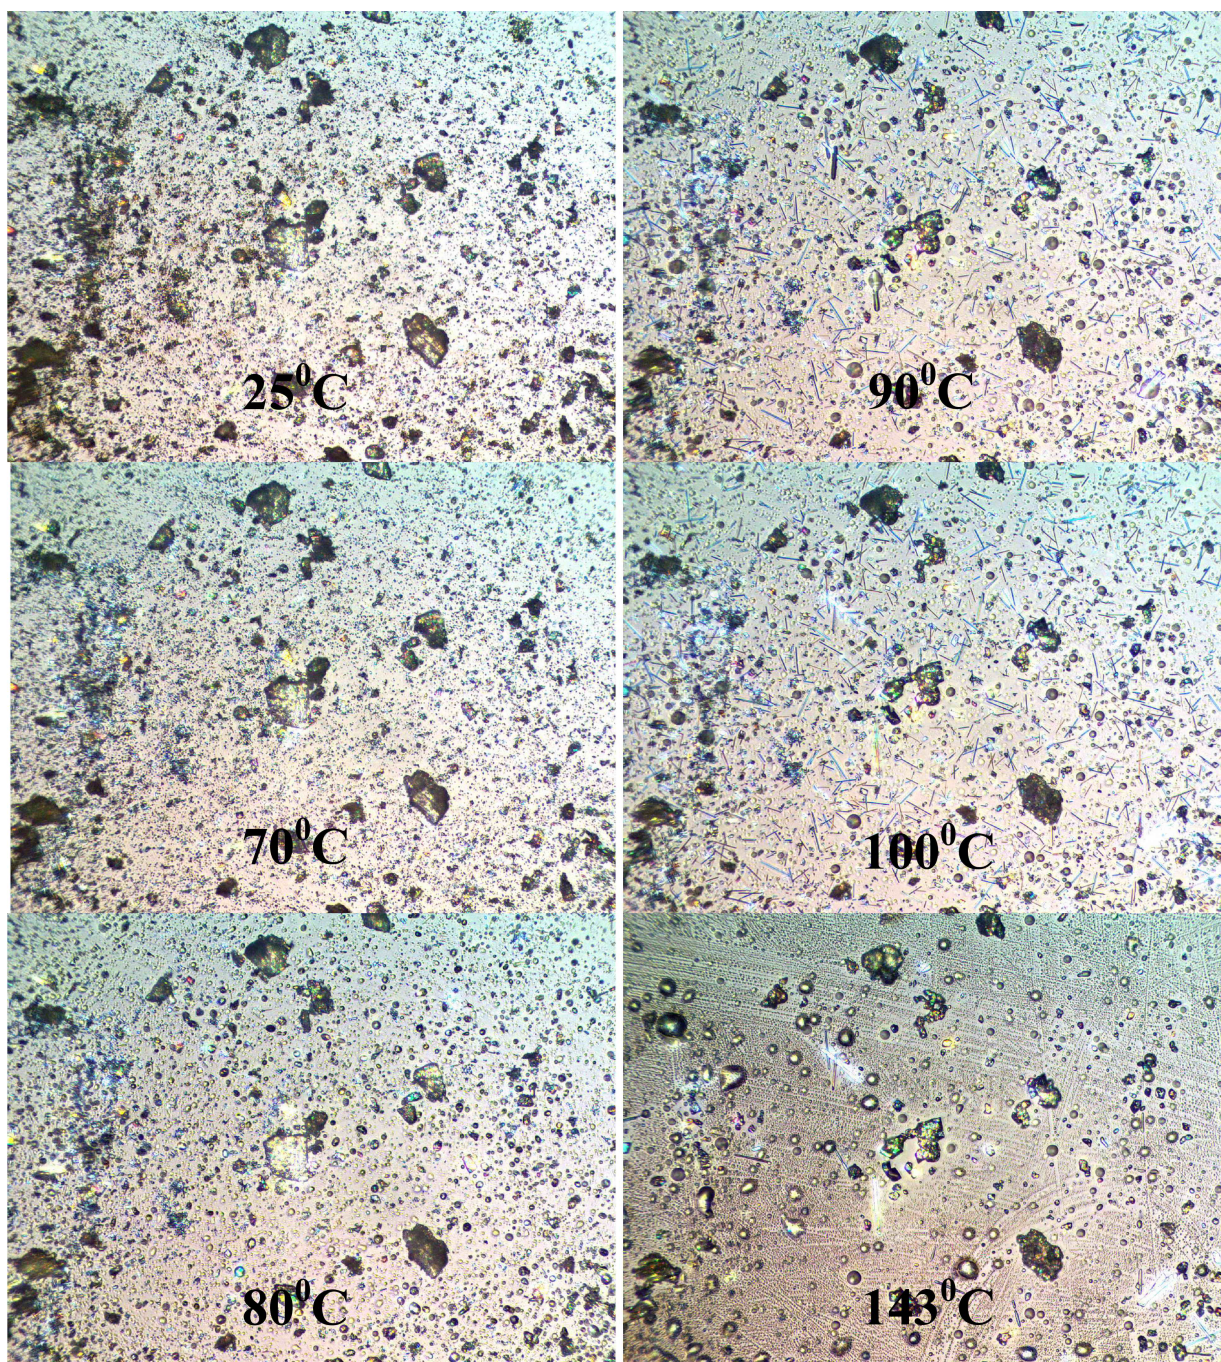

**Fig. S8.** Photomicrographs of [FeI+APN] showing thermal decomposition of the solvate.

## 6. Thermogravimetric analysis

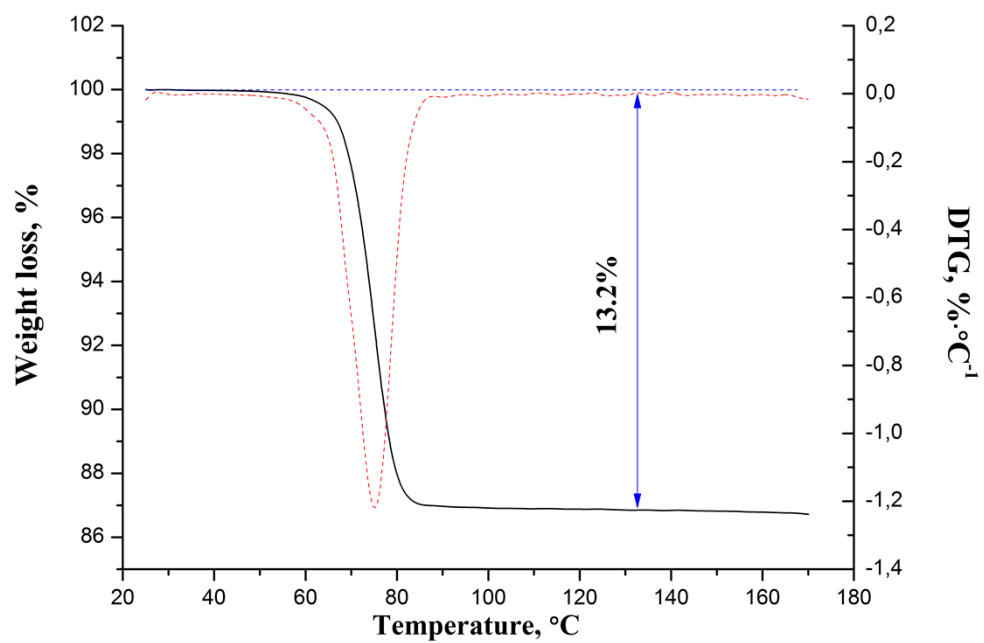

**Fig. S9.** TGA trace of [FeI+ATN] solvate

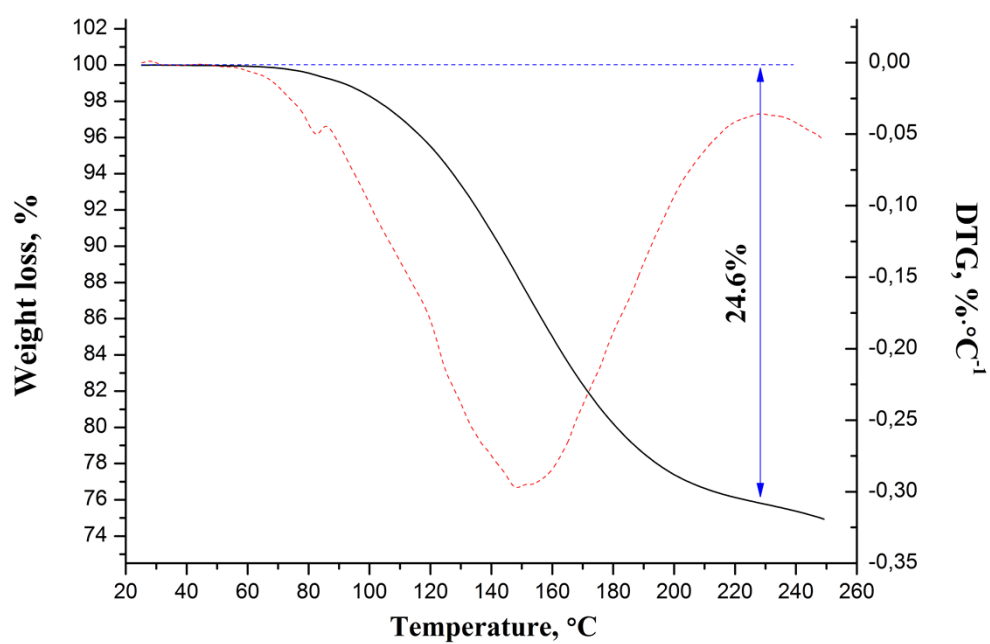

**Fig. S10.** TGA trace of [FeI+APN] solvate

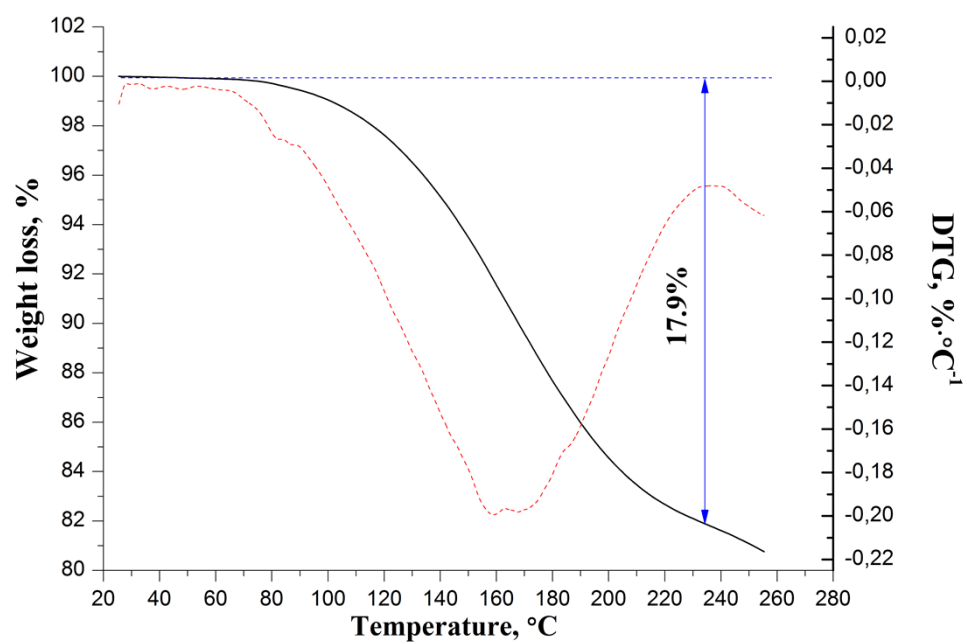

**Fig. S11.** TGA trace of [FeI+DMSO] solvate

## 7. The 2-D fingerprint plots

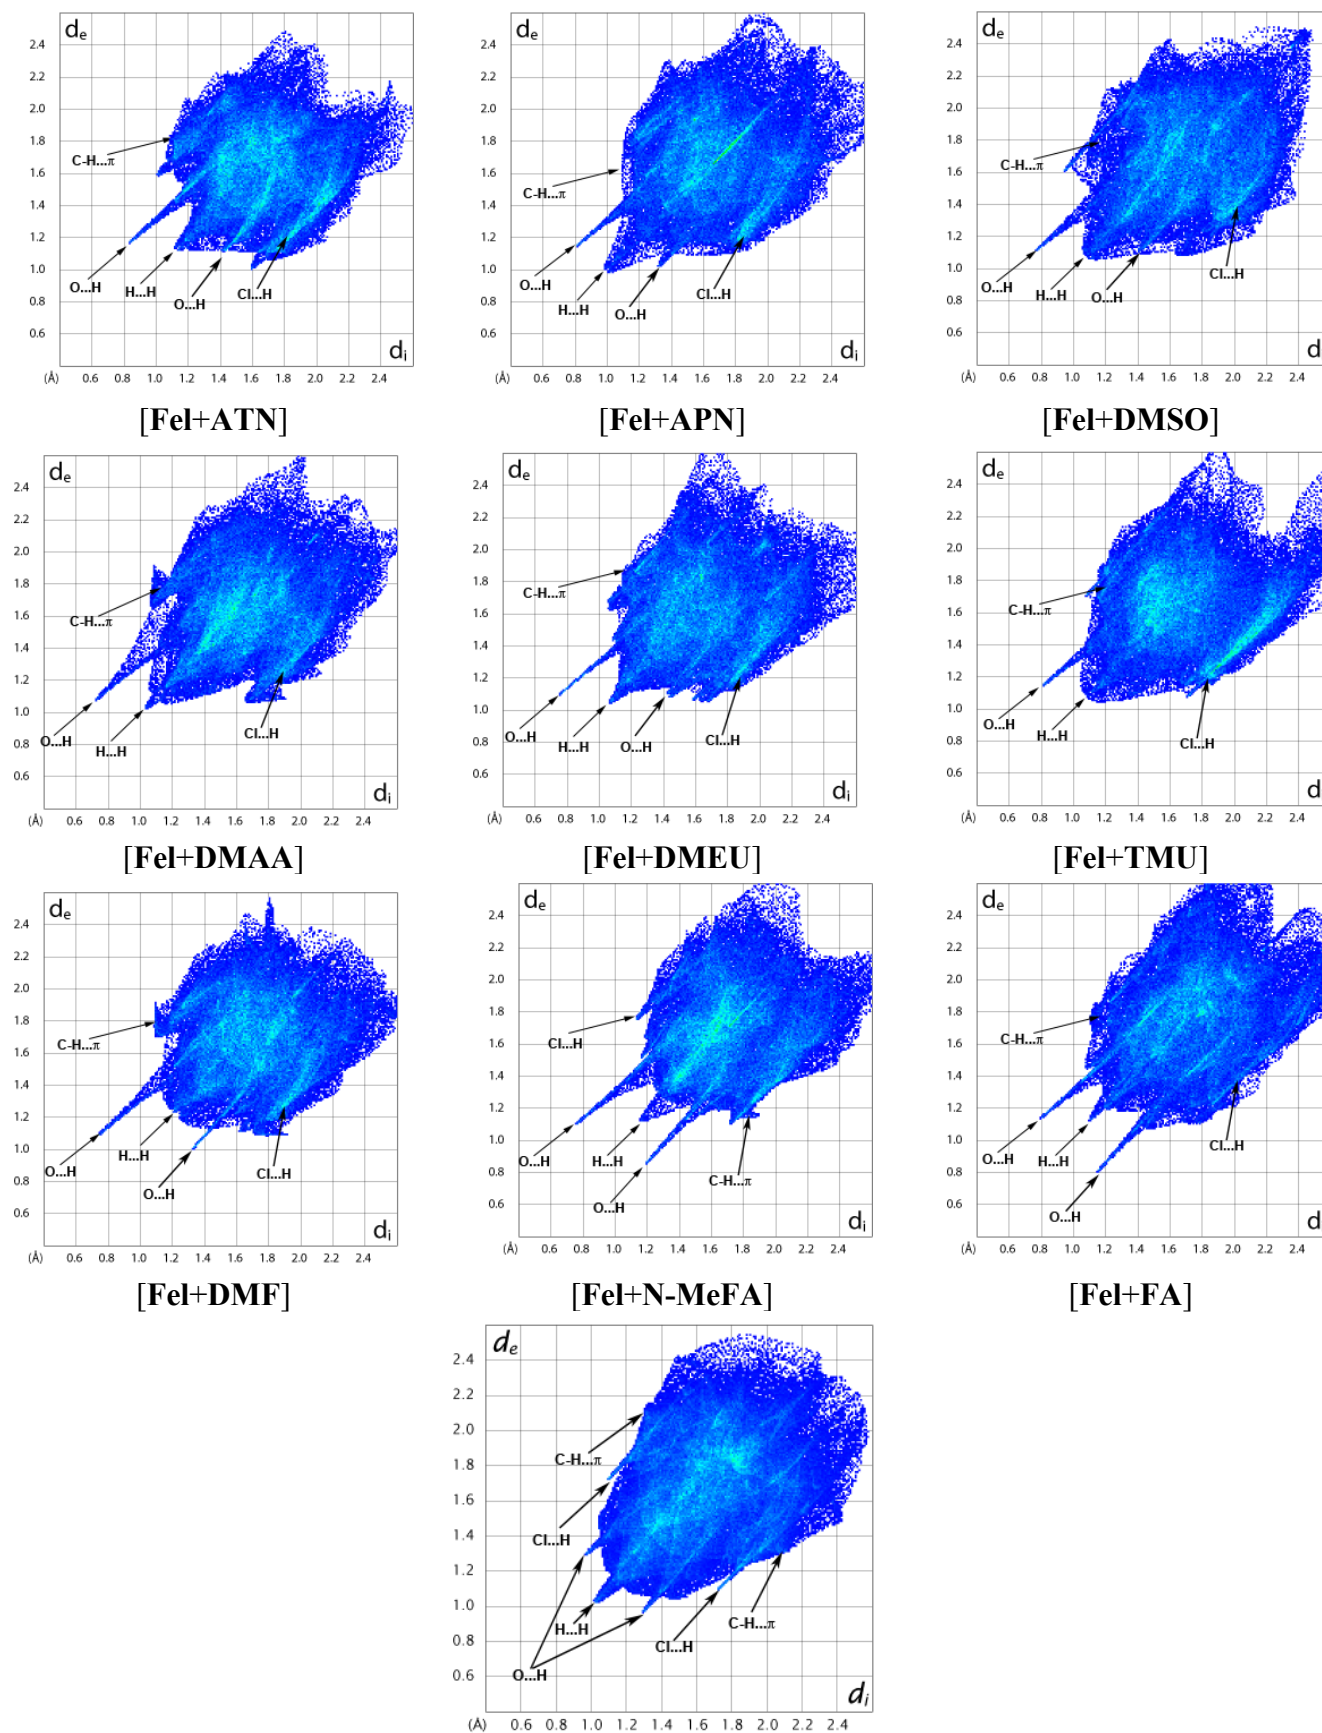

**Fel form I**

**Fig. S12.** 2D fingerprint plots of the felodipine solvates and Fel form I.

## 8. Solution calorimetry data

**Table S1.** The weight, g (mg), solution concentrations, m (mol kg<sup>-1</sup>), and solution enthalpies,  $\Delta H_{sol}^0$  (kJ·mol<sup>-1</sup>), of felodipine and its solvates in respective solvents at 298 K.

| Dimethyl sulfoxide (DMSO)               |                    |                    |                                         |                    |                    |
|-----------------------------------------|--------------------|--------------------|-----------------------------------------|--------------------|--------------------|
| Felodipine                              |                    |                    | [Fel+DMSO]                              |                    |                    |
| mg                                      | m·10 <sup>-3</sup> | $\Delta H_{sol}^0$ | mg                                      | m·10 <sup>-3</sup> | $\Delta H_{sol}^0$ |
| 23.6                                    | 1.26               | 15.2               | 10.6                                    | 0.46               | 31.7               |
| 33.6                                    | 1.79               | 15.2               | 17.7                                    | 0.77               | 30.4               |
| 34.2                                    | 1.83               | 15.2               | 16.1                                    | 0.67               | 31.0               |
| 23.4                                    | 1.25               | 15.1               | 15.3                                    | 0.64               | 30.2               |
| $\Delta H_{sol}^{m,298} = 15.2 \pm 0.1$ |                    |                    | $\Delta H_{sol}^{m,298} = 30.8 \pm 0.3$ |                    |                    |
| Acetophenone (ATN)                      |                    |                    |                                         |                    |                    |
| Felodipine                              |                    |                    | [Fel+APN]                               |                    |                    |
| mg                                      | m·10 <sup>-3</sup> | $\Delta H_{sol}^0$ | mg                                      | m·10 <sup>-3</sup> | $\Delta H_{sol}^0$ |
| 15.1                                    | 0.77               | 11.7               | 14.9                                    | 0.62               | 27.1               |
| 15.1                                    | 0.77               | 10.8               | 15.1                                    | 0.63               | 27.3               |
| 15.1                                    | 0.86               | 11.0               | 15.0                                    | 0.62               | 27.7               |
| 15.1                                    | 0.86               | 11.1               | 15.0                                    | 0.62               | 27.0               |
|                                         |                    |                    | 15.0                                    | 0.62               | 26.5               |
| $\Delta H_{sol}^{m,298} = 11.1 \pm 0.2$ |                    |                    | $\Delta H_{sol}^{m,298} = 27.1 \pm 0.2$ |                    |                    |

## 9. Crystallographic data of the felodipine solvates

**Table S2.** Crystallographic data for the felodipine solvates reported in the literature.

| Compound reference                                                            | [Fel+FA]                                                                            | [Fel+DMF]                                                                                         | [Fel+ N-MeFA]                                                                                     | [Fel+DMAA]                                                                                        | [Fel+DMEU]                                                                                                       | [Fel+TMU]                                                                                                        |
|-------------------------------------------------------------------------------|-------------------------------------------------------------------------------------|---------------------------------------------------------------------------------------------------|---------------------------------------------------------------------------------------------------|---------------------------------------------------------------------------------------------------|------------------------------------------------------------------------------------------------------------------|------------------------------------------------------------------------------------------------------------------|
| Chemical formula                                                              | C <sub>18</sub> H <sub>19</sub> Cl <sub>2</sub> NO <sub>4</sub> •CH <sub>3</sub> NO | C <sub>18</sub> H <sub>19</sub> Cl <sub>2</sub> NO <sub>4</sub> •C <sub>3</sub> H <sub>7</sub> NO | C <sub>18</sub> H <sub>19</sub> Cl <sub>2</sub> NO <sub>4</sub> •C <sub>2</sub> H <sub>5</sub> NO | C <sub>18</sub> H <sub>19</sub> Cl <sub>2</sub> NO <sub>4</sub> •C <sub>4</sub> H <sub>9</sub> NO | C <sub>18</sub> H <sub>19</sub> Cl <sub>2</sub> NO <sub>4</sub> •C <sub>5</sub> H <sub>10</sub> N <sub>2</sub> O | C <sub>18</sub> H <sub>19</sub> Cl <sub>2</sub> NO <sub>4</sub> •C <sub>5</sub> H <sub>12</sub> N <sub>2</sub> O |
| Formula Mass                                                                  | 429.29                                                                              | 434.24                                                                                            | 443.31                                                                                            | 471.36                                                                                            | 498.39                                                                                                           | 500.41                                                                                                           |
| Crystal system                                                                | Triclinic                                                                           | Monoclinic                                                                                        | Triclinic                                                                                         | Monoclinic                                                                                        | Monoclinic                                                                                                       | Monoclinic                                                                                                       |
| <i>a</i> /Å                                                                   | 9.6360(19)                                                                          | 8.8600(10)                                                                                        | 9.5850(19)                                                                                        | 9.1075(4)                                                                                         | 28.6544(12)                                                                                                      | 16.3261(18)                                                                                                      |
| <i>b</i> /Å                                                                   | 11.335(2)                                                                           | 16.008(3)                                                                                         | 10.799(2)                                                                                         | 15.7970(7)                                                                                        | 11.4450(5)                                                                                                       | 11.4866(11)                                                                                                      |
| <i>c</i> /Å                                                                   | 11.685(2)                                                                           | 16.657(4)                                                                                         | 11.388(2)                                                                                         | 16.6894(7)                                                                                        | 14.5730(6)                                                                                                       | 14.7468(17)                                                                                                      |
| <i>a</i> /Å                                                                   | 100.99(3)                                                                           | 90.00                                                                                             | 74.70(3)                                                                                          | 90.00                                                                                             | 90.00                                                                                                            | 90.00                                                                                                            |
| $\beta$ /°                                                                    | 112.09(3)                                                                           | 103.560(10)                                                                                       | 88.60(3)                                                                                          | 105.699(1)                                                                                        | 90.715(1)                                                                                                        | 111.959(3)                                                                                                       |
| $\gamma$ /°                                                                   | 107.52(3)                                                                           | 90.00                                                                                             | 74.08(3)                                                                                          | 90.00                                                                                             | 90.00                                                                                                            | 90.00                                                                                                            |
| Unit cell volume/Å <sup>3</sup>                                               | 1058.9(4)                                                                           | 2296.6(7)                                                                                         | 1091.9(4)                                                                                         | 2311.55(17)                                                                                       | 4778.8(3)                                                                                                        | 2564.9(5)                                                                                                        |
| Temperature/K                                                                 | 295(2)                                                                              | 293(2)                                                                                            | 293(2)                                                                                            | 150(2)                                                                                            | 150(2)                                                                                                           | 220(2)                                                                                                           |
| Space group                                                                   | <b>PError!</b>                                                                      | <i>P</i> 21/ <i>c</i>                                                                             | <b>PError!</b>                                                                                    | <i>P</i> 21/ <i>n</i>                                                                             | <i>C</i> 2/ <i>c</i>                                                                                             | <i>P</i> 21/ <i>c</i>                                                                                            |
| No. of formula units per unit cell, <i>Z</i>                                  | 2                                                                                   | 4                                                                                                 | 2                                                                                                 | 4                                                                                                 | 8                                                                                                                | 4                                                                                                                |
| No. of reflections measured                                                   | 8620                                                                                | 5265                                                                                              | 4557                                                                                              | 30341                                                                                             | 36365                                                                                                            | 21211                                                                                                            |
| No. of independent reflections                                                | 4547                                                                                | 4045                                                                                              | 4262                                                                                              | 5576                                                                                              | 5967                                                                                                             | 5566                                                                                                             |
| <i>R</i> <sub>int</sub>                                                       | 0.0157                                                                              | 0.0315                                                                                            | 0.1243                                                                                            | 0.0271                                                                                            | 0.0242                                                                                                           | 0.0626                                                                                                           |
| Final <i>R</i> <sub><i>I</i></sub> values ( <i>I</i> > 2σ( <i>I</i> ))        | 0.0627                                                                              | 0.0543                                                                                            | 0.0630                                                                                            | 0.0475                                                                                            | 0.0469                                                                                                           | 0.0563                                                                                                           |
| Final <i>wR</i> ( <i>F</i> <sup>2</sup> ) values ( <i>I</i> > 2σ( <i>I</i> )) | 0.1872                                                                              | 0.1319                                                                                            | 0.1647                                                                                            | 0.1343                                                                                            | 0.1202                                                                                                           | 0.1420                                                                                                           |
| Final <i>R</i> <sub><i>I</i></sub> values (all data)                          | 0.0692                                                                              | 0.1039                                                                                            | 0.1718                                                                                            | 0.0578                                                                                            | 0.0540                                                                                                           | 0.1033                                                                                                           |
| Final <i>wR</i> ( <i>F</i> <sup>2</sup> ) values (all data)                   | 0.1978                                                                              | 0.1545                                                                                            | 0.1943                                                                                            | 0.1422                                                                                            | 0.1248                                                                                                           | 0.1579                                                                                                           |
| Goodness of fit on <i>F</i> <sup>2</sup>                                      | 1.078                                                                               | 1.026                                                                                             | 0.899                                                                                             | 1.070                                                                                             | 1.084                                                                                                            | 0.959                                                                                                            |
| Ref. code                                                                     | COXGOM                                                                              | [8]                                                                                               | [8]                                                                                               | BICNEI                                                                                            | BICNAE                                                                                                           | BICMUX                                                                                                           |

## 10. References

1. A. O. Surov, K. A. Solanko, A. D. Bond, A. Bauer-Brandl and G. L. Perlovich, *CrystEngComm*, 2013, **15**, 6054.
2. a) I. A. Khodov, S. V. Efimov, M. Yu. Nikiforov, V. V. Klochkov and N. Georgi, *J. Pharm. Sci.*, 2014, **103**, 392; b) I. A. Khodov, M. Yu. Nikiforov, G. A. Alper, D. S. Blokhin, S. V. Efimov, V. V. Klochkov and N. Georgi, *J. Mol. Struct.*, 2013, **1035**, 358.
3. V. I. Teberekidis and M. P. Sigalas, *J. Mol. Struct.: THEOCHEM*, 2007, **803**, 29.
4. O.A. Raevsky, V.J. Grigor'ev, S.V. Trepalin. HYBOT program package, Registration by Russian State Patent Agency N 990090 of 26.02.99.
5. O.A. Raevsky, V.A. Gerasimenko, S.V. Trepalin. MOLDIVS (MOlecular DIversity& Similarity) program package, Registration by Russian State Patent Agency N 990093 of 26.02.99.
6. J. A. Chisholm and S. Motherwell, *J. Appl. Crystallogr.* 2005, **38**, 228.
7. C. F. Macrae, P. R. Edgington, P. McCabe, E. Pidcock, G. P. Shields, R. Taylor, M. Towler and J. van de Streek, *J. Appl. Crystallogr.* 2006, **39**, 453.
8. G. L. Perlovich, S. V. Blokhina, N. G. Manin, T. V. Volkova and V. V. Tkachev, *CrystEngComm*, 2012, **14**, 8577.
